# Supplementary material
Source: publisher site journal article supplement (https://www.dovepress.com/article/435236)
Supplement: Supplementary file 1 [file get_supplementary_file.php]

**Table S1** High-frequency keywords from the included papers of primary dysmenorrhea

| **No.** | **Keywords** | **Frequency** | **Percentage,%** | **Cumulative percentage,%** |
| --- | --- | --- | --- | --- |
| 1 | primary dysmenorrhea | 459 | 13.1031 | 13.1031 |
| 2 | dysmenorrhea | 272 | 7.7648 | 20.8678 |
| 3 | pain | 93 | 2.6549 | 23.5227 |
| 4 | menstrual pain | 50 | 1.4273 | 24.95 |
| 5 | transcutaneous electrical nerve stimulation | 42 | 1.199 | 26.149 |
| 6 | adolescent | 41 | 1.1704 | 27.3194 |
| 7 | prevalence | 41 | 1.1704 | 28.4899 |
| 8 | acupuncture | 40 | 1.1419 | 29.6317 |
| 9 | life quality | 38 | 1.0848 | 30.7165 |
| 10 | menstruation | 33 | 0.942 | 31.6586 |
| 11 | herbal medicine | 26 | 0.7422 | 32.4008 |
| 12 | treatment | 24 | 0.6851 | 33.0859 |
| 13 | menstrual cycle | 23 | 0.6566 | 33.7425 |
| 14 | functional connectivity | 22 | 0.628 | 34.3705 |
| 15 | pelvic pain | 21 | 0.5995 | 34.97 |
| 16 | pain intensity | 21 | 0.5995 | 35.5695 |
| 17 | anxiety | 21 | 0.5995 | 36.169 |
| 18 | prostaglandin | 20 | 0.5709 | 36.7399 |
| 19 | acupressure | 19 | 0.5424 | 37.2823 |
| 20 | Women′s health | 18 | 0.5138 | 37.7962 |
| 21 | epidemiology | 17 | 0.4853 | 38.2815 |
| 22 | sleep | 17 | 0.4853 | 38.7668 |
| 23 | lifestyle | 17 | 0.4853 | 39.2521 |
| 24 | Cross-sectional studies | 16 | 0.4568 | 39.7088 |
| 25 | reward system | 16 | 0.4568 | 40.1656 |
| 26 | nutrition | 16 | 0.4568 | 40.6223 |
| 27 | randomized controlled trial | 15 | 0.4282 | 41.0505 |
| 28 | ibuprofen | 15 | 0.4282 | 41.4787 |
| 29 | vitamin E | 14 | 0.3997 | 41.8784 |
| 30 | protocol | 14 | 0.3997 | 42.278 |
| 31 | aromatherapy | 13 | 0.3711 | 42.6492 |
| 32 | women | 13 | 0.3711 | 43.0203 |
| 33 | chronic pain | 12 | 0.3426 | 43.3628 |
| 34 | impact | 12 | 0.3426 | 43.7054 |
| 35 | mefenamic acid | 12 | 0.3426 | 44.048 |
| 36 | pain sensitivity | 11 | 0.314 | 44.362 |
| 37 | central sensitization | 11 | 0.314 | 44.676 |
| 38 | medication | 11 | 0.314 | 44.99 |
| 39 | depression | 10 | 0.2855 | 45.2755 |
| 40 | body mass index | 10 | 0.2855 | 45.5609 |
| 41 | Self-medication | 10 | 0.2855 | 45.8464 |
| 42 | pain management | 10 | 0.2855 | 46.1319 |
| 43 | exercise | 10 | 0.2855 | 46.4174 |
| 44 | students | 10 | 0.2855 | 46.7028 |

**Table S2** Matrix of high-frequency keywords source papers

| **No.** | **Highly frequent keywords** | **Source papers ID** | | | | |
| --- | --- | --- | --- | --- | --- | --- |
| **0001** | **0002** | **…** | **902** | **903** |
| **1** | **primary dysmenorrhea** | **1** | **1** | **…** | **1** | **1** |
| **2** | **dysmenorrhea** | **0** | **0** | **…** | **0** | **0** |
| **3** | **pain** | **0** | **0** | **…** | **0** | **0** |
| **4** | **menstrual pain** | **1** | **0** | **…** | **0** | **0** |
| **…** | **…** | **…** | **…** | **…** | **…** | **…** |
| **43** | **exercise** | **0** | **0** | **…** | **0** | **0** |
| **44** | **students** | **0** | **0** | **…** | **0** | **0** |

**Table S3 The centrality of 44 high-frequency keywords**

| **Degree centrality** | | |  | **Betweenness centrality** | | |  | **Closeness centrality** | | |
| --- | --- | --- | --- | --- | --- | --- | --- | --- | --- | --- |
| **Nodes** | **Degree** | |  | **Nodes** | **Degree** | |  | **Nodes** | **Degree** | |
| dysmenorrhea | | 37 |  | dysmenorrhea | | 273.78 |  | dysmenorrhea | | 49 |
| primary dysmenorrhea | | 36 |  | primary dysmenorrhea | | 272.16 |  | primary dysmenorrhea | | 50 |
| menstrual pain | | 24 |  | menstrual pain | | 57.81 |  | menstrual pain | | 62 |
| pain | | 22 |  | pain | | 51.46 |  | pain | | 64 |
| menstruation | | 16 |  | prevalence | | 34.27 |  | menstruation | | 70 |
| life quality | | 16 |  | adolescent | | 22.47 |  | life quality | | 70 |
| prevalence | | 14 |  | menstruation | | 20.45 |  | prevalence | | 72 |
| adolescent | | 13 |  | life quality | | 13.83 |  | adolescent | | 73 |
| acupuncture | | 11 |  | acupuncture | | 13.24 |  | acupuncture | | 75 |
| menstrual cycle | | 11 |  | anxiety | | 5.99 |  | menstrual cycle | | 75 |
| anxiety | | 10 |  | menstrual cycle | | 3.37 |  | anxiety | | 76 |
| women | | 9 |  | impact | | 2.85 |  | women | | 77 |
| central sensitization | | 8 |  | lifestyle | | 2.74 |  | central sensitization | | 78 |
| pain sensitivity | | 8 |  | ibuprofen | | 1.88 |  | chronic pain | | 78 |
| chronic pain | | 8 |  | women | | 1.71 |  | pain management | | 79 |
| pain management | | 7 |  | acupressure | | 1.50 |  | acupressure | | 79 |
| treatment | | 7 |  | pain sensitivity | | 1.13 |  | treatment | | 79 |
| ibuprofen | | 7 |  | functional connectivity | | 1.11 |  | ibuprofen | | 79 |
| acupressure | | 7 |  | epidemiology | | 1.10 |  | mefenamic acid | | 80 |
| transcutaneous electrical nerve stimulation | | 6 |  | treatment | | 1.00 |  | transcutaneous electrical nerve stimulation | | 80 |
| pelvic pain | | 6 |  | sleep | | 0.88 |  | pelvic pain | | 80 |
| mefenamic acid | | 6 |  | pain management | | 0.75 |  | depression | | 80 |
| lifestyle | | 6 |  | Women′s health | | 0.58 |  | lifestyle | | 80 |
| depression | | 6 |  | central sensitization | | 0.53 |  | randomized controlled trial | | 81 |
| sleep | | 5 |  | chronic pain | | 0.53 |  | pain sensitivity | | 81 |
| pain intensity | | 5 |  | depression | | 0.27 |  | pain intensity | | 81 |
| randomized controlled trial | | 5 |  | vitamin E | | 0.17 |  | prostaglandin | | 81 |
| prostaglandin | | 5 |  | herbal medicine | | 0.17 |  | impact | | 81 |
| Women′s health | | 5 |  | pelvic pain | | 0.14 |  | herbal medicine | | 82 |
| epidemiology | | 5 |  | Transcutaneous electrical nerve stimulation | | 0.14 |  | aromatherapy | | 82 |
| impact | | 5 |  | protocol | | 0 |  | vitamin E | | 82 |
| functional connectivity | | 4 |  | randomized controlled trial | | 0 |  | exercise | | 83 |
| herbal medicine | | 4 |  | pain intensity | | 0 |  | epidemiology | | 84 |
| Self-medication | | 4 |  | Cross-sectional studies | | 0 |  | sleep | | 86 |
| Cross-sectional studies | | 4 |  | mefenamic acid | | 0 |  | body mass index | | 86 |
| medication | | 4 |  | reward system | | 0 |  | Women′s health | | 86 |
| nutrition | | 4 |  | nutrition | | 0 |  | Self-medication | | 87 |
| aromatherapy | | 4 |  | medication | | 0 |  | nutrition | | 87 |
| vitamin E | | 4 |  | prostaglandin | | 0 |  | Cross-sectional studies | | 87 |
| students | | 3 |  | body mass index | | 0 |  | medication | | 87 |
| exercise | | 3 |  | Self-medication | | 0 |  | functional connectivity | | 88 |
| reward system | | 2 |  | aromatherapy | | 0 |  | students | | 89 |
| protocol | | 2 |  | exercise | | 0 |  | protocol | | 91 |
| body mass index | | 2 |  | students | | 0 |  | reward system | | 91 |

**Table S4** Highly cited papers in the list of references from the included papers of Primary dysmenorrhea

| **No.** | **Bibliographic information** | **Cited frequency** | **Percentage, %** | **Cumulative percentage, %** |
| --- | --- | --- | --- | --- |
| 1 | Dawood MY, 2006, OBSTET GYNECOL, V108, P428 | 206 | 0.52 | 0.516 |
| 2 | Iacovides S, 2015, HUM REPROD UPDATE, V21, P762 | 183 | 0.46 | 0.9744 |
| 3 | Proctor M, 2006, BMJ-BRIT MED J, V332, P1134 | 159 | 0.40 | 1.3726 |
| 4 | Ju H, 2014, EPIDEMIOL REV, V36, P104 | 154 | 0.39 | 1.7584 |
| 5 | ANDERSCH B, 1982, AM J OBSTET GYNECOL, V144, P655 | 148 | 0.37 | 2.1291 |
| 6 | French L, 2005, AM FAM PHYSICIAN, V71, P285 | 120 | 0.30 | 2.4297 |
| 7 | Burnett M, 2017, J OBSTET GYNAECOL CA, V39, P585 | 119 | 0.30 | 2.7278 |
| 8 | Coco AS, 1999, AM FAM PHYSICIAN, V60, P489 | 110 | 0.28 | 3.0033 |
| 9 | Lefebvre G, 2005, J OBSTET GYNAECOL CA, V27, P1117 | 109 | 0.27 | 3.2763 |
| 10 | Unsal A, 2010, UPSALA J MED SCI, V115, P138 | 101 | 0.25 | 3.5293 |
| 11 | Banikarim C, 2000, ARCH PEDIAT ADOL MED, V154, P1226 | 95 | 0.24 | 3.7673 |
| 12 | SUNDELL G, 1990, BRIT J OBSTET GYNAEC, V97, P588 | 94 | 0.24 | 4.0027 |
| 13 | Marjoribanks J, 2015, COCHRANE DB SYST REV | 88 | 0.22 | 4.2231 |
| 14 | Harlow SD, 1996, BRIT J OBSTET GYNAEC, V103, P1134 | 85 | 0.21 | 4.436 |
| 15 | Zahradnik HP, 2010, CONTRACEPTION, V81, P185 | 83 | 0.21 | 4.6439 |
| 16 | Tu CH, 2009, NEUROIMAGE, V47, P28 | 77 | 0.19 | 4.8368 |
| 17 | PICKLES V R, 1965, J Obstet Gynaecol Br Commonw, V72, P185 | 76 | 0.19 | 5.0272 |
| 18 | Burnett MA, 2005, J OBSTET GYNAECOL CA, V27, P765 | 75 | 0.19 | 5.215 |
| 19 | LUNDSTROM V, 1978, AM J OBSTET GYNECOL, V130, P640 | 75 | 0.19 | 5.4029 |
| 20 | Polat A, 2009, ARCH GYNECOL OBSTET, V279, P527 | 74 | 0.19 | 5.5883 |
| 21 | Hillen TIJ, 1999, J ADOLESCENT HEALTH, V25, P40 | 73 | 0.18 | 5.7711 |
| 22 | Jamieson DJ, 1996, OBSTET GYNECOL, V87, P55 | 73 | 0.18 | 5.954 |
| 23 | Proctor M L, 2002, COCHRANE DB SYST REV | 70 | 0.18 | 6.1293 |
| 24 | YLIKORKALA O, 1978, AM J OBSTET GYNECOL, V130, P833 | 68 | 0.17 | 6.2996 |
| 25 | Bernardi Mariagiulia, 2017, F1000Res, V6, P1645 | 67 | 0.17 | 6.4674 |
| 26 | Tu CH, 2010, PAIN, V150, P462 | 66 | 0.17 | 6.6328 |
| 27 | Latthe P, 2006, BMC PUBLIC HEALTH, V6 | 60 | 0.15 | 6.7831 |
| 28 | Weissman AM, 2004, BJOG-INT J OBSTET GY, V111, P345 | 60 | 0.15 | 6.9333 |
| 29 | Durain D, 2004, J MIDWIFERY WOM HEAL, V49, P520 | 59 | 0.15 | 7.0811 |
| 30 | Wei SY, 2016, PAIN, V157, P92 | 59 | 0.15 | 7.2289 |
| 31 | Patel V, 2006, BJOG-INT J OBSTET GY, V113, P453 | 59 | 0.15 | 7.3767 |
| 32 | Ortiz MI, 2009, INT J GYNECOL OBSTET, V107, P240 | 59 | 0.15 | 7.5245 |
| 33 | Harel Zeev, 2006, J Pediatr Adolesc Gynecol, V19, P363 | 58 | 0.15 | 7.6698 |
| 34 | CSAPO AI, 1977, PROSTAGLANDINS, V13, P193 | 57 | 0.14 | 7.8125 |
| 35 | Zhang WY, 1998, BRIT J OBSTET GYNAEC, V105, P780 | 55 | 0.14 | 7.9503 |
| 36 | KLEIN JR, 1981, PEDIATRICS, V68, P661 | 52 | 0.13 | 8.0806 |
| 37 | Ortiz MI, 2010, EUR J OBSTET GYN R B, V152, P73 | 52 | 0.13 | 8.2108 |
| 38 | Latthe P, 2006, BMJ-BRIT MED J, V332, P749 | 51 | 0.13 | 8.3386 |
| 39 | Akin MD, 2001, OBSTET GYNECOL, V97, P343 | 51 | 0.13 | 8.4663 |
| 40 | AKERLUND M, 1976, BRIT J OBSTET GYNAEC, V83, P673 | 50 | 0.13 | 8.5915 |
| 41 | Chen Chung-Hey, 2006, Health Care Women Int, V27, P418 | 50 | 0.13 | 8.7168 |
| 42 | De Sanctis V, 2015, PEDIATR ENDOCR REV P, V13, P512 | 50 | 0.13 | 8.842 |
| 43 | Vincent K, 2011, PAIN, V152, P1966 | 50 | 0.13 | 8.9673 |
| 44 | Osayande AS, 2014, AM FAM PHYSICIAN, V89, P341 | 50 | 0.13 | 9.0925 |
| 45 | DAWOOD MY, 1985, J REPROD MED, V30, P154 | 49 | 0.12 | 9.2152 |
| 46 | Chen HM, 2004, J ADV NURS, V48, P380 | 49 | 0.12 | 9.338 |
| 47 | Kannan P, 2014, J PHYSIOTHER, V60, P13 | 49 | 0.12 | 9.4607 |
| 48 | Pawlowski B, 2004, ANN HUM BIOL, V31, P1 | 49 | 0.12 | 9.5834 |

**Table S5** The centrality of 48 highly cited papers

| **No.** | **High cited papers** | **Degree Centrality** |
| --- | --- | --- |
| 8 | Coco AS, 1999, AM FAM PHYSICIAN, V60, P489 | 47 |
| 12 | SUNDELL G, 1990, BRIT J OBSTET GYNAEC, V97, P588 | 47 |
| 1 | Dawood MY, 2006, OBSTET GYNECOL, V108, P428 | 46 |
| 5 | ANDERSCH B, 1982, AM J OBSTET GYNECOL, V144, P655 | 46 |
| 18 | Burnett MA, 2005, J OBSTET GYNAECOL CA, V27, P765 | 46 |
| 4 | Ju H, 2014, EPIDEMIOL REV, V36, P104 | 45 |
| 10 | Unsal A, 2010, UPSALA J MED SCI, V115, P138 | 45 |
| 14 | Harlow SD, 1996, BRIT J OBSTET GYNAEC, V103, P1134 | 45 |
| 3 | Proctor M, 2006, BMJ-BRIT MED J, V332, P1134 | 45 |
| 22 | Jamieson DJ, 1996, OBSTET GYNECOL, V87, P55 | 45 |
| 9 | Lefebvre G, 2005, J OBSTET GYNAECOL CA, V27, P1117 | 45 |
| 39 | Akin MD, 2001, OBSTET GYNECOL, V97, P343 | 45 |
| 6 | French L, 2005, AM FAM PHYSICIAN, V71, P285 | 45 |
| 21 | Hillen TIJ, 1999, J ADOLESCENT HEALTH, V25, P40 | 45 |
| 45 | DAWOOD MY, 1985, J REPROD MED, V30, P154 | 45 |
| 11 | Banikarim C, 2000, ARCH PEDIAT ADOL MED, V154, P1226 | 44 |
| 37 | Ortiz MI, 2010, EUR J OBSTET GYN R B, V152, P73 | 44 |
| 2 | Iacovides S, 2015, HUM REPROD UPDATE, V21, P762 | 44 |
| 28 | Weissman AM, 2004, BJOG-INT J OBSTET GY, V111, P345 | 44 |
| 23 | Proctor M L, 2002, COCHRANE DB SYST REV | 44 |
| 7 | Burnett M, 2017, J OBSTET GYNAECOL CA, V39, P585 | 43 |
| 20 | Polat A, 2009, ARCH GYNECOL OBSTET, V279, P527 | 43 |
| 13 | Marjoribanks J, 2015, COCHRANE DB SYST REV | 43 |
| 29 | Durain D, 2004, J MIDWIFERY WOM HEAL, V49, P520 | 43 |
| 27 | Latthe P, 2006, BMC PUBLIC HEALTH, V6 | 43 |
| 15 | Zahradnik HP, 2010, CONTRACEPTION, V81, P185 | 43 |
| 46 | Chen HM, 2004, J ADV NURS, V48, P380 | 42 |
| 36 | KLEIN JR, 1981, PEDIATRICS, V68, P661 | 42 |
| 38 | Latthe P, 2006, BMJ-BRIT MED J, V332, P749 | 41 |
| 19 | LUNDSTROM V, 1978, AM J OBSTET GYNECOL, V130, P640 | 41 |
| 41 | Chen Chung-Hey, 2006, Health Care Women Int, V27, P418 | 41 |
| 31 | Patel V, 2006, BJOG-INT J OBSTET GY, V113, P453 | 41 |
| 33 | Harel Zeev, 2006, J Pediatr Adolesc Gynecol, V19, P363 | 41 |
| 32 | Ortiz MI, 2009, INT J GYNECOL OBSTET, V107, P240 | 40 |
| 26 | Tu CH, 2010, PAIN, V150, P462 | 40 |
| 44 | Osayande AS, 2014, AM FAM PHYSICIAN, V89, P341 | 40 |
| 25 | Bernardi Mariagiulia, 2017, F1000Res, V6, P1645 | 39 |
| 35 | Zhang WY, 1998, BRIT J OBSTET GYNAEC, V105, P780 | 39 |
| 43 | Vincent K, 2011, PAIN, V152, P1966 | 38 |
| 24 | YLIKORKALA O, 1978, AM J OBSTET GYNECOL, V130, P833 | 37 |
| 16 | Tu CH, 2009, NEUROIMAGE, V47, P28 | 37 |
| 48 | Pawlowski B, 2004, ANN HUM BIOL, V31, P1 | 36 |
| 47 | Kannan P, 2014, J PHYSIOTHER, V60, P13 | 36 |
| 42 | De Sanctis V, 2015, PEDIATR ENDOCR REV P, V13, P512 | 34 |
| 17 | PICKLES V R, 1965, J Obstet Gynaecol Br Commonw, V72, P185 | 28 |
| 30 | Wei SY, 2016, PAIN, V157, P92 | 26 |
| 40 | AKERLUND M, 1976, BRIT J OBSTET GYNAEC, V83, P673 | 15 |
| 34 | CSAPO AI, 1977, PROSTAGLANDINS, V13, P193 | 14 |


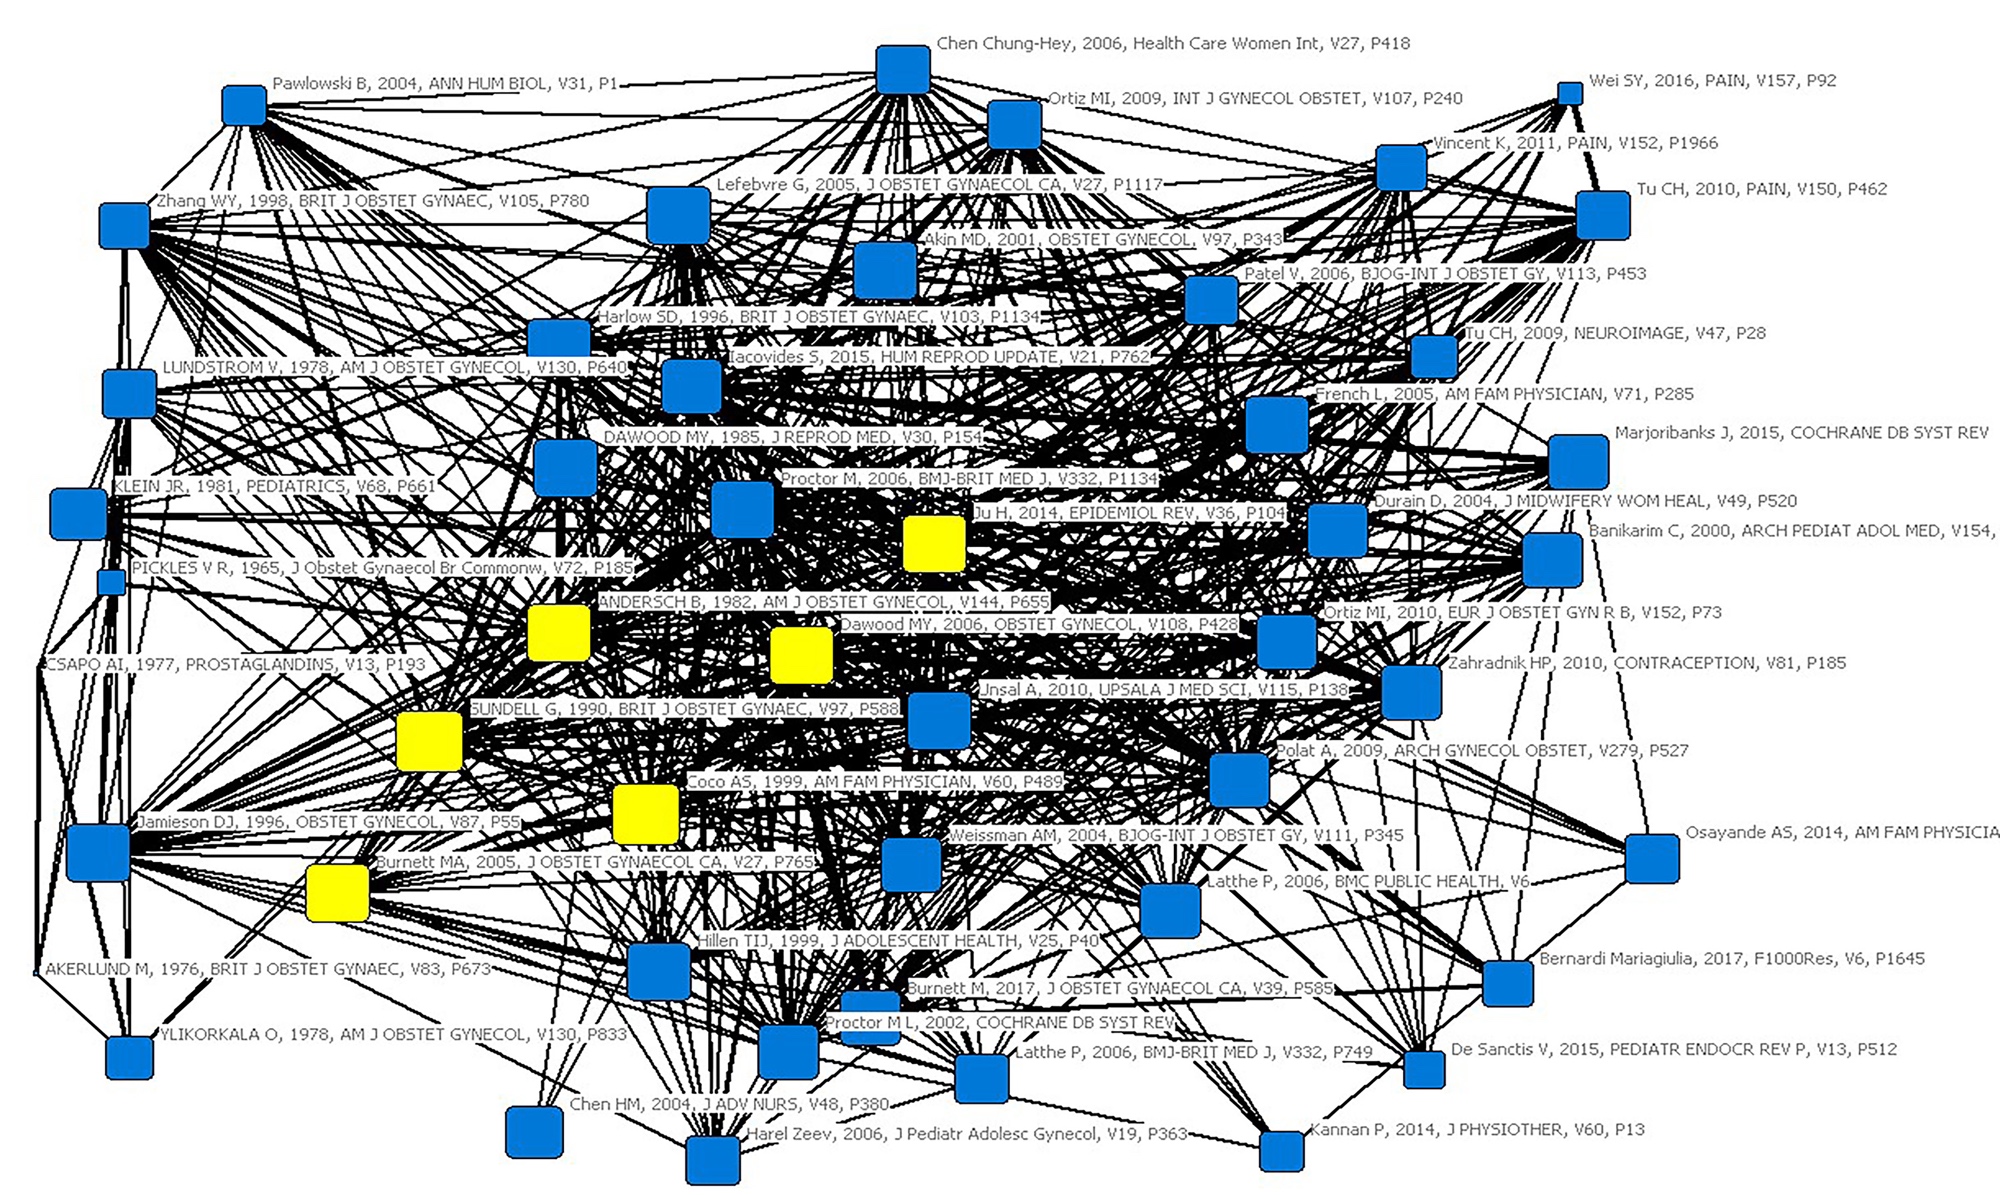
**Figure S1**

**Figure legends**

Figure S1: The co-citation network diagram of the 48 highly cited papers.
